# Supplementary material for: Mutational landscape of RNA-binding proteins in human cancers
Source: PubMed Central journal article supplement — RNA Biol. 2017 Nov 14;15(1):115–29. doi: 10.1080/15476286.2017.1391436 (PMC5786023; doi:10.1080/15476286.2017.1391436), 2017-11-14
Supplement: krnb-15-01-1391436-s006.pdf [file krnb-15-01-1391436-s006.pdf]

relative

row min

row max

ACC  
BLCA  
BRCA  
CESC  
COAD  
GBM  
HNSC  
KICH  
KIRC  
KIRP  
LAML  
LGG  
LIHC  
LUAD  
LUSC  
OV  
PAAD  
PCPG  
PRAD  
READ  
SKCM  
STAD  
THCA  
UCEC  
UCS  
UVM

RBP

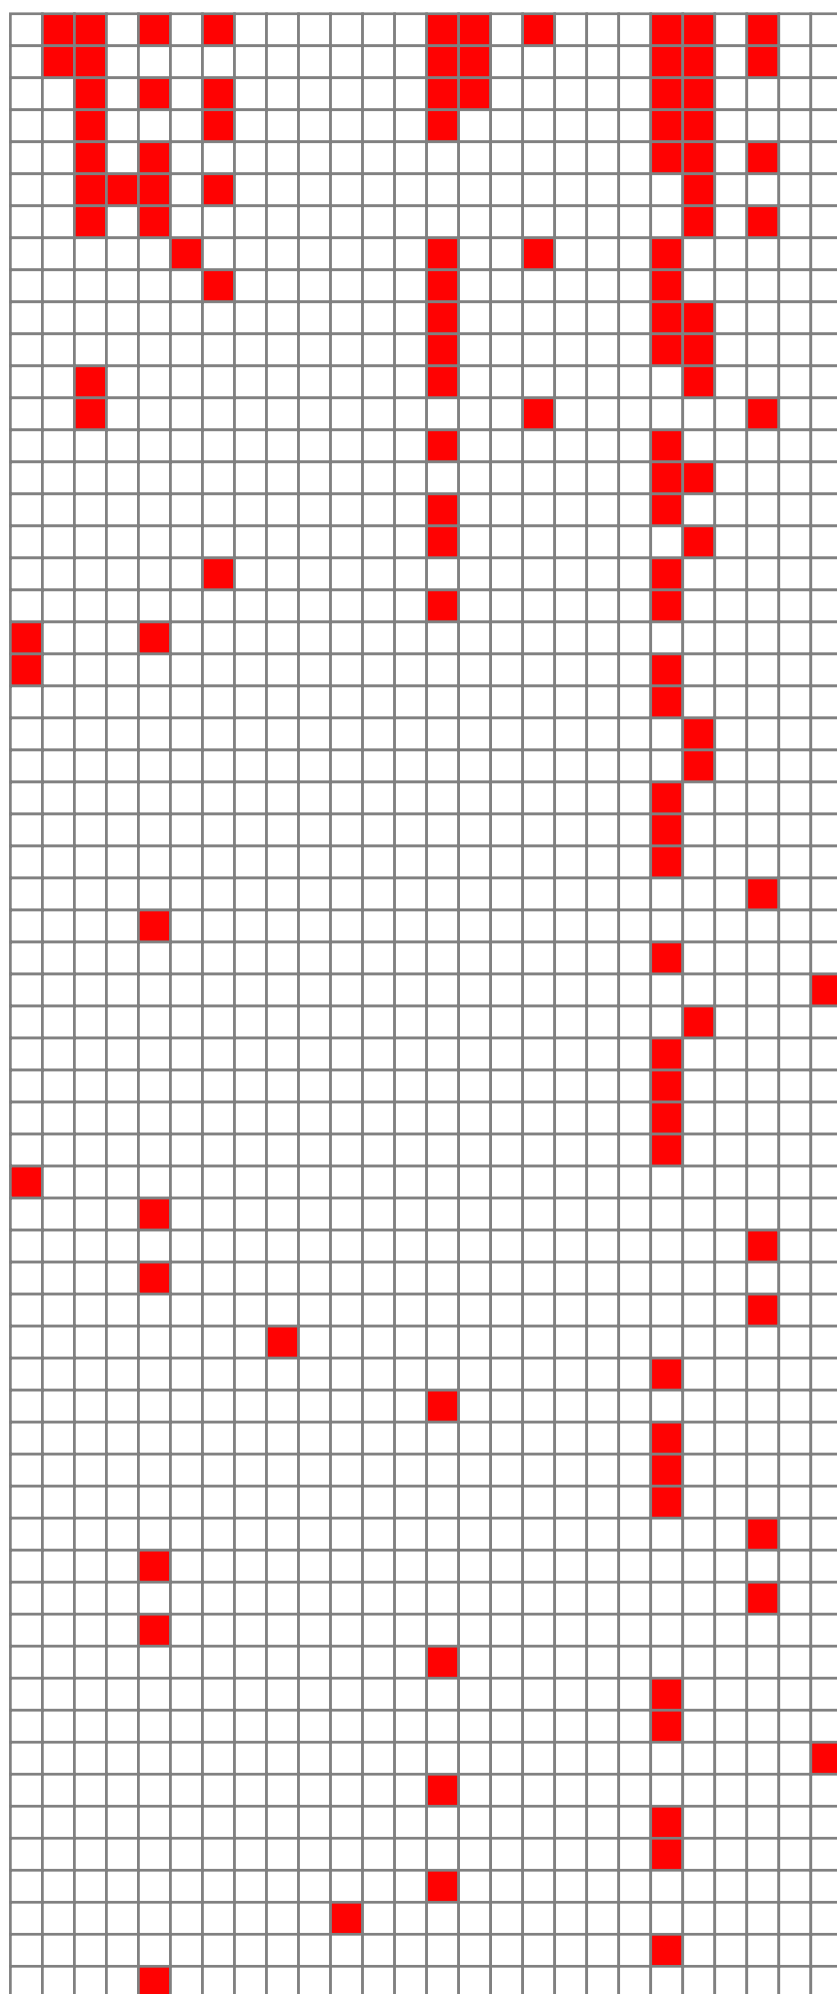

AHNAK  
KMT2C  
SYNE1  
COL14A1  
LRP1  
MYH9  
DYNC1H1  
NBPF10  
CDKN2A  
DIDO1  
DSP  
FLNA  
MDN1  
BCLAF1  
GCN1L1  
PLEC  
PRKDC  
PRPF6  
XIRP1  
ZNF598  
EPPK1  
A1CF  
AGO2  
ASCC3  
ASS1  
C4BPA  
CCDC108  
CNOT1  
CRNKL1  
DDX43  
EIF1AX  
EIF4G1  
ELAVL2  
ENOX1  
ESRP1  
FLNB  
GLTSCR2  
GOLGB1  
GSPT2  
HELZ2  
HSP90AB1  
HSPA8  
KHDRBS2  
MKI67  
MOV10L1  
NLRP11  
PCDH20  
POLR2B  
POLRMT  
PRPF8  
RALY  
RBM10  
RIMS1  
SAMS1  
SF3B1  
SNRPN  
SPEN  
TEP1  
TUBB4A  
U2AF1  
ZNF239  
LENG9
