# Supplementary material for: Mutational landscape of RNA-binding proteins in human cancers
Source: PubMed Central journal article supplement — RNA Biol. 2017 Nov 14;15(1):115–29. doi: 10.1080/15476286.2017.1391436 (PMC5786023; doi:10.1080/15476286.2017.1391436), 2017-11-14

**A** Frequency Plot of Candidate RBP drivers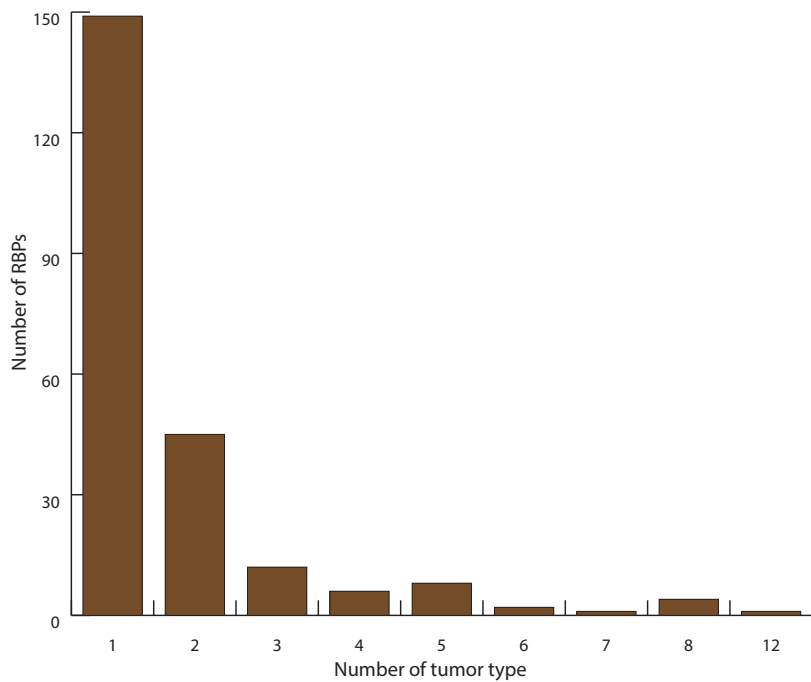**B** Frequency Plot of Candidate Non-RBP drivers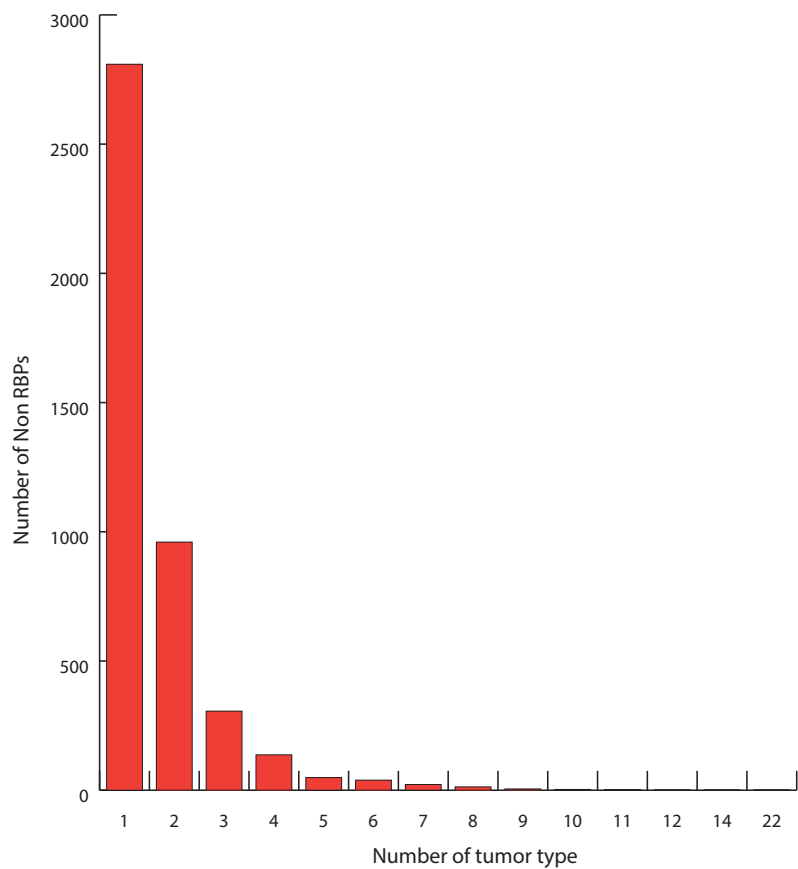**C** Mutation diagram**AGO2**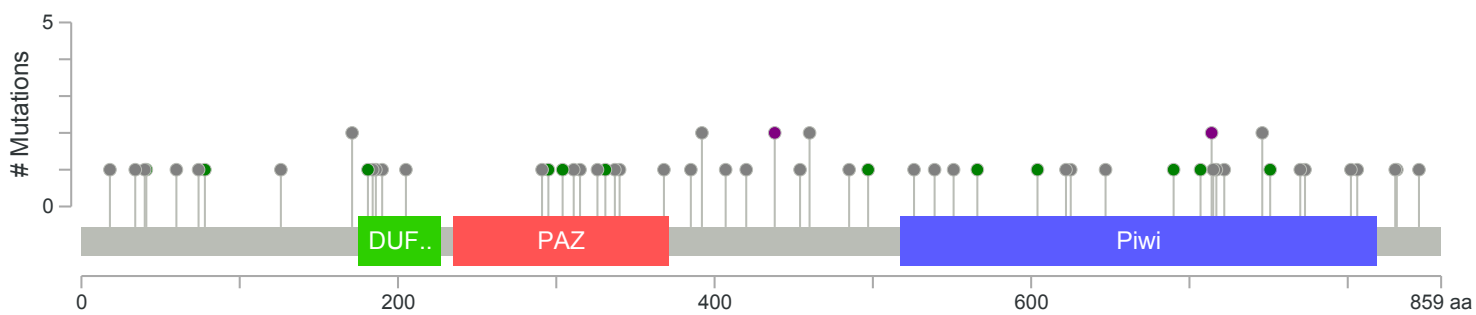**SF3B1**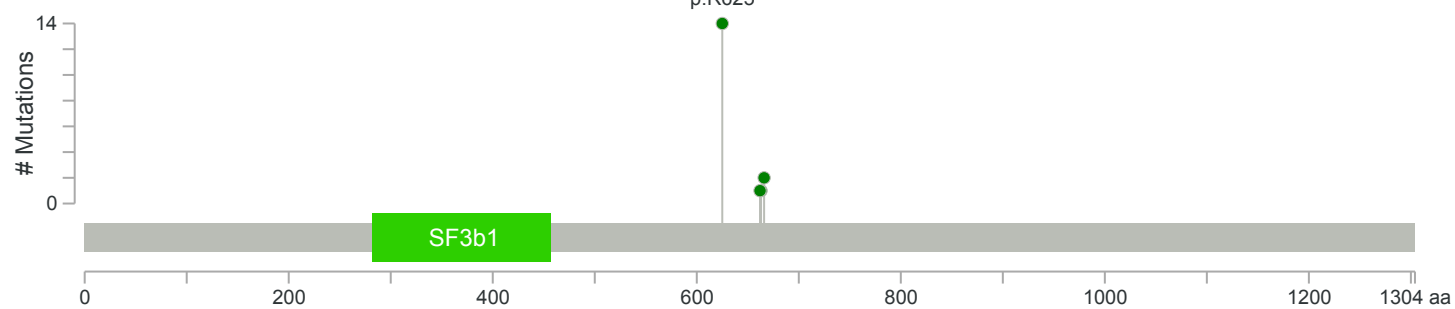**U2AF1**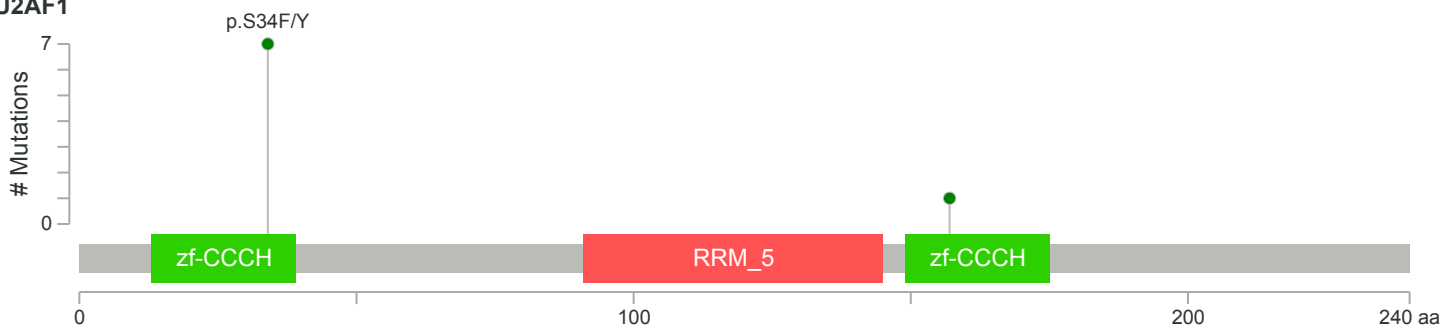

Supplement: krnb-15-01-1391436-s007.pdf [file krnb-15-01-1391436-s007.pdf]
