# Supplementary material for: Mutational landscape of RNA-binding proteins in human cancers
Source: PubMed Central journal article supplement — RNA Biol. 2017 Nov 14;15(1):115–29. doi: 10.1080/15476286.2017.1391436 (PMC5786023; doi:10.1080/15476286.2017.1391436), 2017-11-14
Supplement: krnb-15-01-1391436-s008.pdf [file krnb-15-01-1391436-s008.pdf]

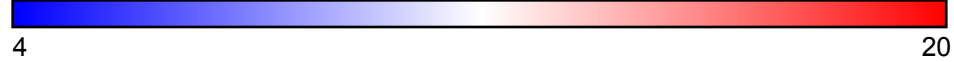

4 20

ACC  
BLCA  
BRCA  
CESC  
COAD  
GBM  
HNSC  
KICH  
KIRC  
KIRP  
LAML  
LGG  
LIHC  
LUAD  
LUSC  
OV  
PAAD  
PCPG  
PRAD  
READ  
SKCM  
STAD  
THCA  
UCEC  
UCS  
UVM

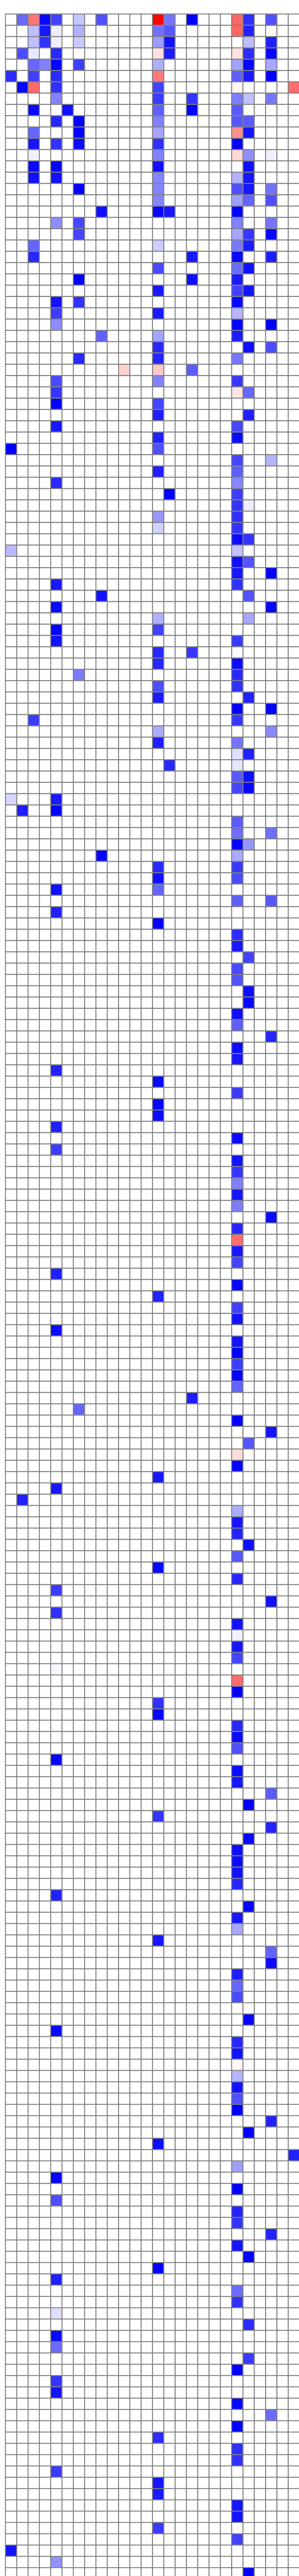

AHNAK  
SYNE1  
MYH9  
KMT2C  
DYNC1H1  
LRP1  
SF3B1  
POLR2A  
NBPF10  
SPTBN1  
COL14A1  
SPTAN1  
PRPF8  
DSP  
FLNA  
HSP90AB1  
TUBB4A  
DHX4  
PRPF6  
AGO1  
AGO2  
MDN1  
DIDO1  
ACO1  
PRKDC  
MACF1  
LARP1  
CNOT1  
HSPA8  
CLTC  
CDKN2A  
U2AF1  
SNRNP200  
GCN1L1  
SFMBT2  
ADARB1  
VCP  
SMG1  
CHD2  
POLR2B  
XIRP1  
PURG  
CDC40  
ASCC3  
CELF4  
DHX38  
RPUXD4  
EPPK1  
EEF2  
UPF1  
DHX34  
HSP90AA1  
SF3B3  
EFTUD2  
PES1  
GOLGB1  
GOT2  
PPARGC1B  
SORBS2  
DIS3  
DCAF13  
DIEXF  
IREB2  
SKIV2L2  
IGF2BP1  
AQR  
GTPBP4  
PRRC2B  
ESRP1  
ZNF598  
CRNKL1  
PLEC  
NSUN2  
DHX36  
SECISBP2L  
SF3A1  
BCLAF1  
XRN1  
DARS  
MTDH  
GAPDH  
ENOX2  
RPL11  
RBMS3  
A1CF  
DHX16  
ALDH18A1  
MTO1  
FASN  
IPO5  
LSG1  
DDX52  
DDX43  
HELZ2  
HDAC2  
TEP1  
SNRPN  
PNPT1  
ABT1  
WDR75  
GFM1  
YBX2  
UNK  
RBM26  
FARSB  
DHX8  
EIF3E  
TDRKH  
ALDH6A1  
TOP2A  
EEF1A1  
FAM120C  
KRR1  
RBM10  
PPARGC1A  
AGO3  
GRB2  
PARP12  
FYT1D1  
C4BPA  
CSTF1  
SAMS1  
HSPA5  
PABPC4  
MOV10L1  
MTIF2  
GTPBP1  
HSPG2  
HERC5  
MYO5A  
POLRMT  
XRN2  
PCDH20  
SPEN  
MARK2  
PTCD3  
CDK13  
YLPM1  
MTCL1  
PCBP1  
GSPT2  
ENSG00000261934  
SF3A3  
DDX3X  
RIMS1  
LUC7L2  
SND1  
FLNB  
ZC3H12B  
NMD3  
CKAP4  
GSPT1  
DHX15  
BOLL  
UTP20  
KIAA0430  
FNDC3A  
HSPA9  
ALKBH8  
RTCB  
TOP3B  
KRI1  
SUCLG1  
BYSL  
ENOX1  
RALYL  
RALY  
MRPS9  
ACTN1  
RBF1X1  
MKI67  
OLA1  
MCTS1  
SLC25A11  
KHDRBS2  
ELAVL2  
EIF4G1  
ACAA2  
MYO18A  
DDX5  
RARS2  
DDX17  
NOMO1  
PCSK9  
ADARB2  
CCDC108  
IGF2BP3  
TUBB2B  
CCT4  
EIF1AX  
CSNK1E  
IBA57  
ZC3H12D  
NOP58  
SFSWAP  
LBR  
SUPT16H  
ASS1  
YWHAZ  
FAM120A  
LENG9  
NLRP11  
SYNJ1  
PTPN1  
RPL10  
RBM22  
TES  
RPS5  
DCN  
RCC2  
TNPO1  
EZR  
NAP1L4  
HK2  
NOP56  
ZNF239  
DMGDH  
PABPC4L  
TPR  
CDC5L  
FXR1  
TCF20  
PCBP3  
RC3H1  
GLTSCR2  
SMC1A  
HSP90B1  
SYNJ2
