# Supplementary material for: Mutational landscape of RNA-binding proteins in human cancers
Source: PubMed Central journal article supplement — RNA Biol. 2017 Nov 14;15(1):115–29. doi: 10.1080/15476286.2017.1391436 (PMC5786023; doi:10.1080/15476286.2017.1391436), 2017-11-14
Supplement: krnb-15-01-1391436-s009.pdf [file krnb-15-01-1391436-s009.pdf]

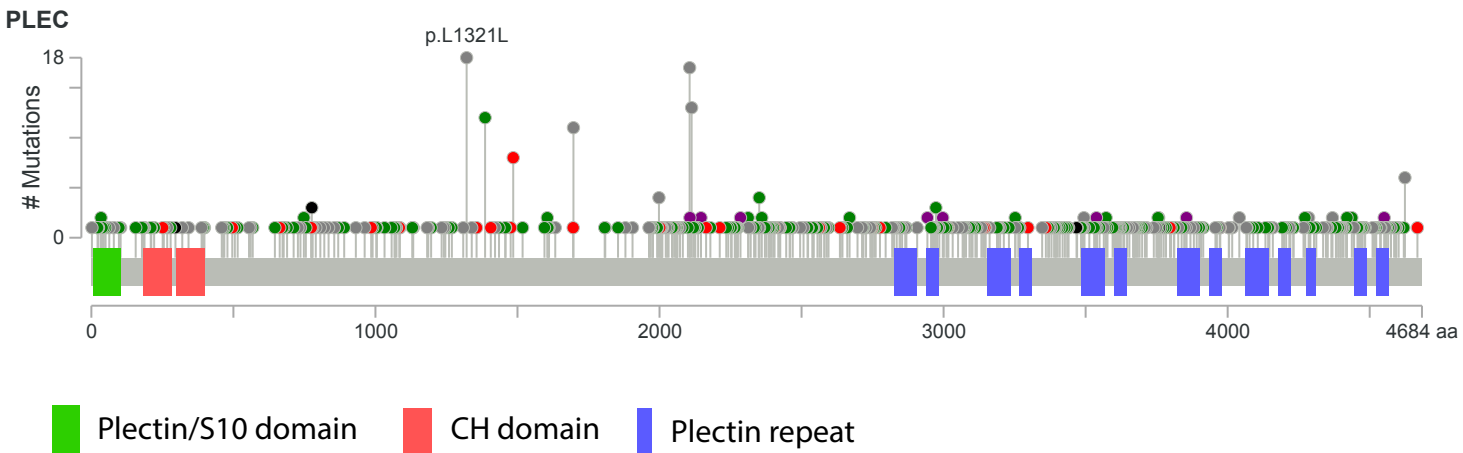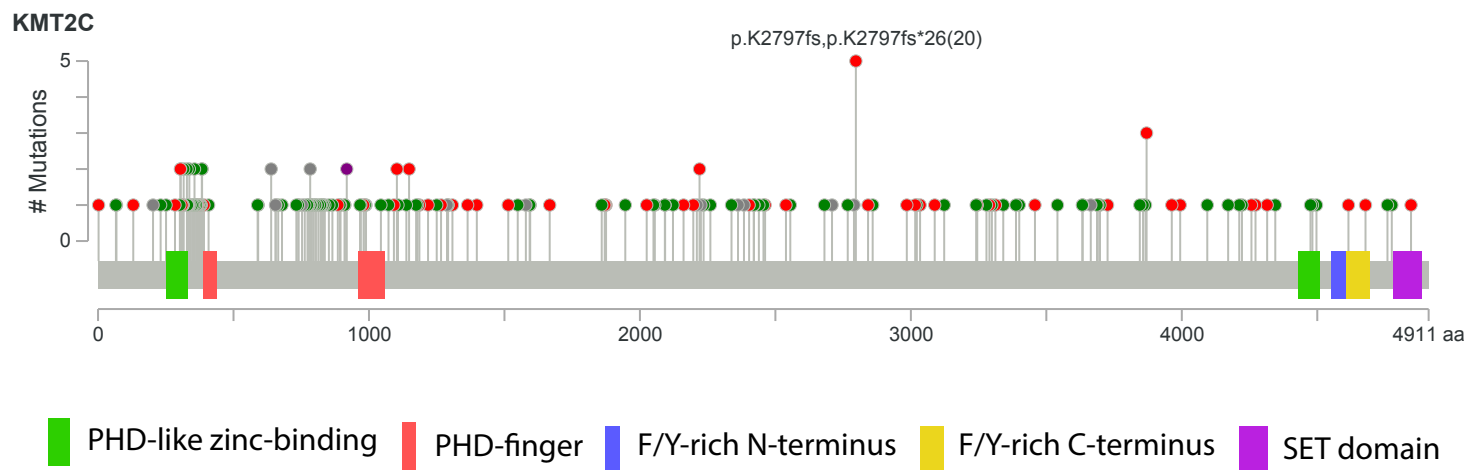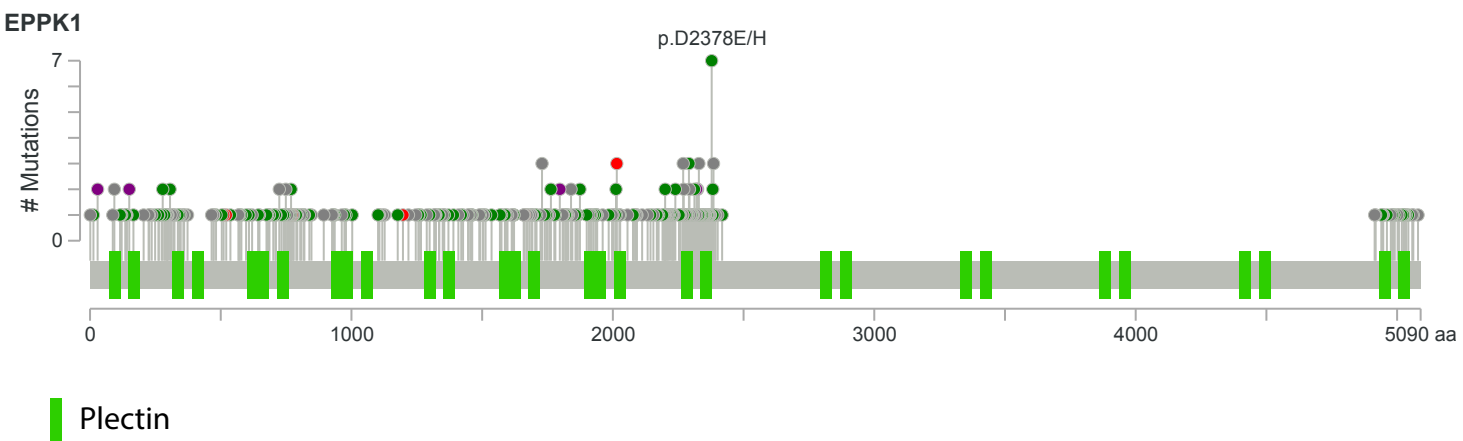

Color codes :

- Missense Mutations
- Truncating Mutations : Nonsense, Nonstop, Frameshift deletion, Frameshift insertion, Splice site
- Inframe Mutations
- Other Mutations
- Residues affected by different mutations
