# Supplementary figures and images for: Mutational landscape of RNA-binding proteins in human cancers
Source: PubMed Central journal article supplement — RNA Biol. 2017 Nov 14;15(1):115–29. doi: 10.1080/15476286.2017.1391436 (PMC5786023; doi:10.1080/15476286.2017.1391436), 2017-11-14

-Log(Corrected p-value)

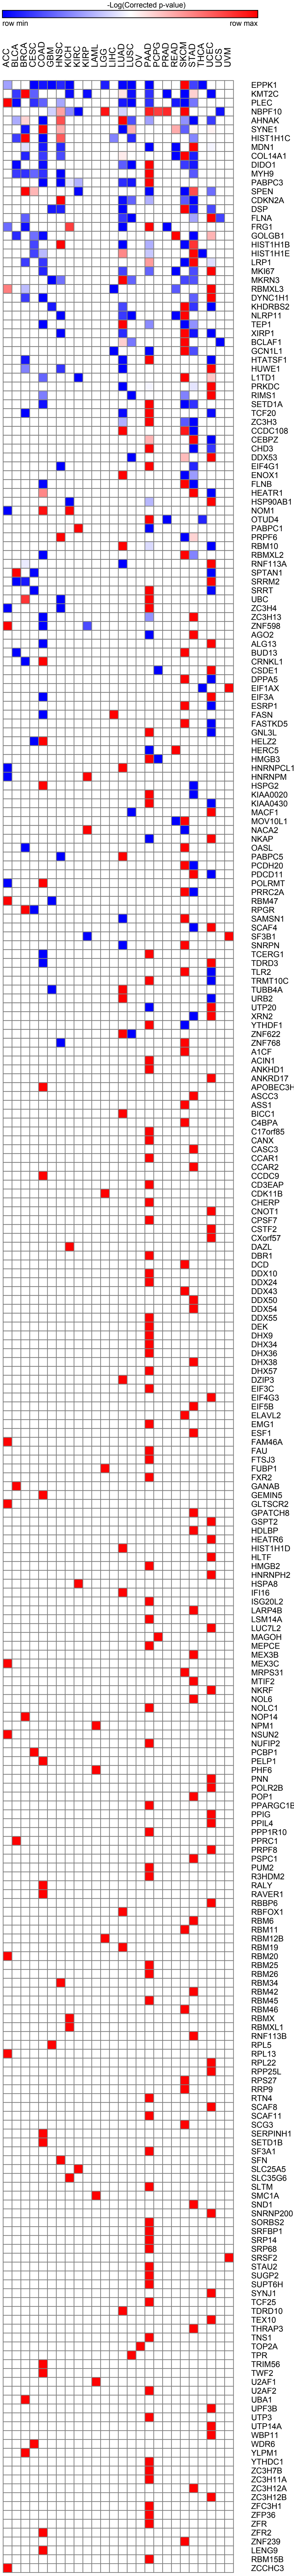

Supplement: krnb-15-01-1391436-s010.pdf [file krnb-15-01-1391436-s010.pdf]

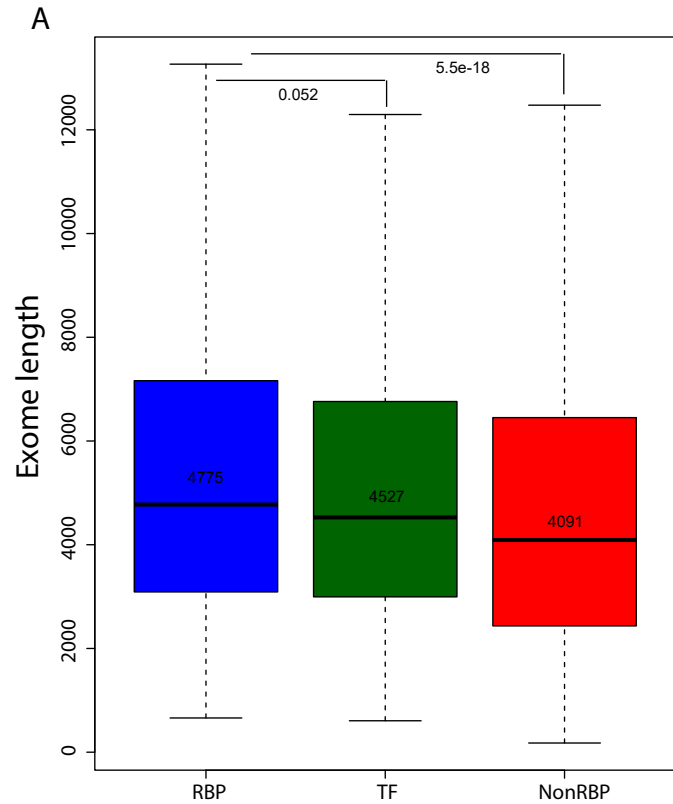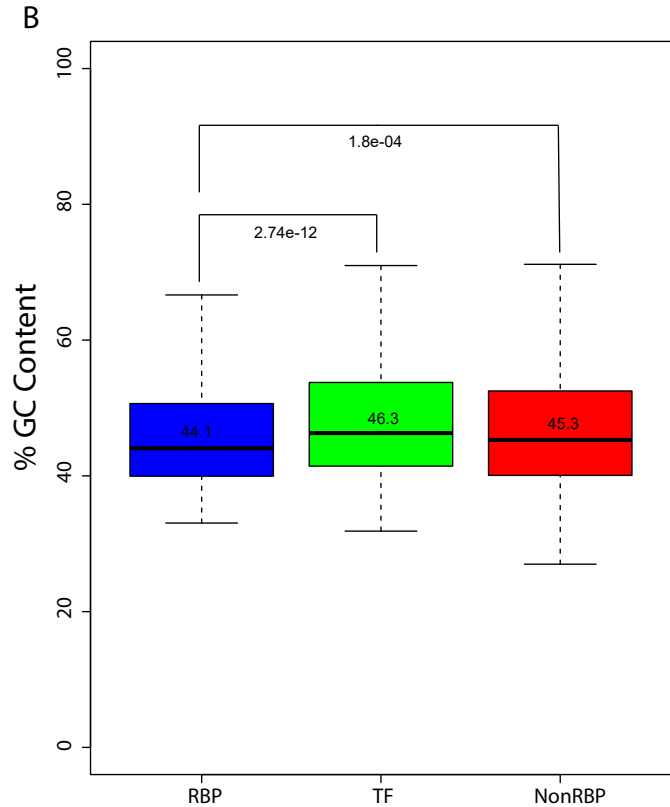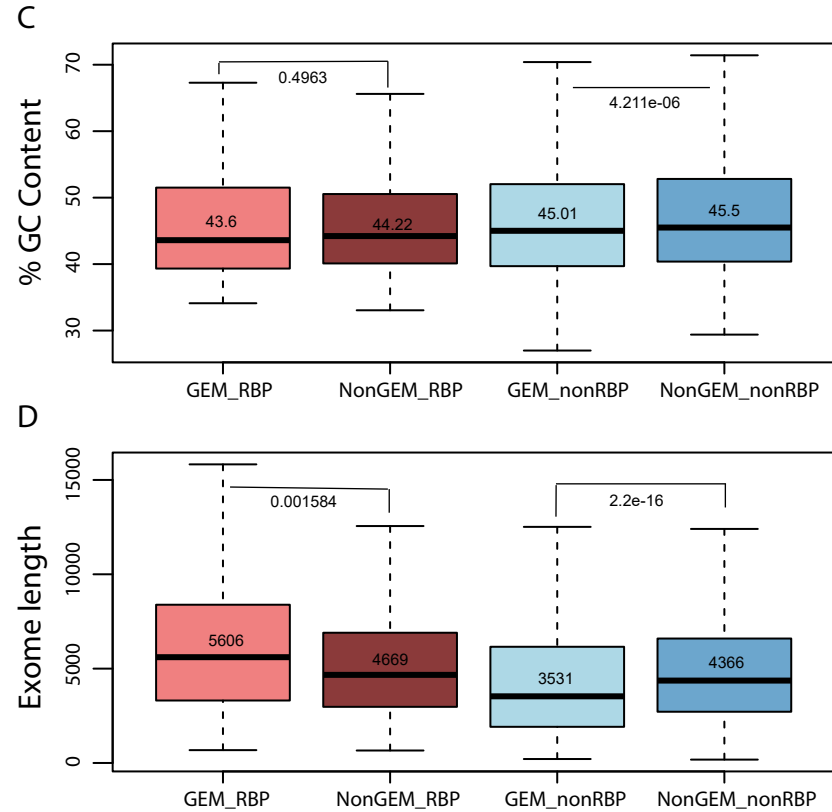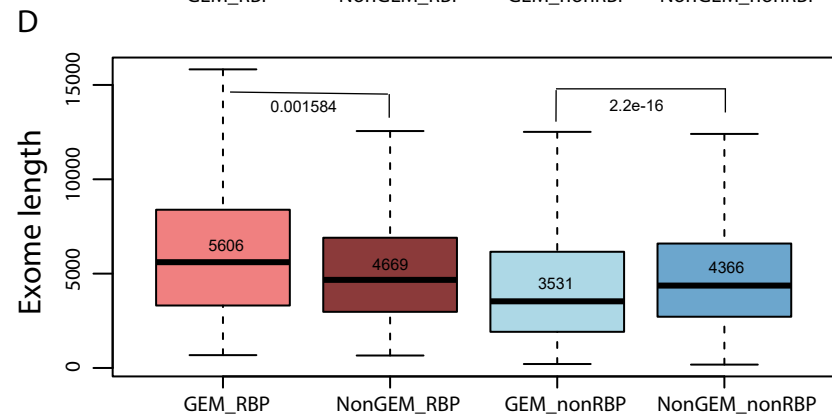

Supplement: krnb-15-01-1391436-s011.pdf [file krnb-15-01-1391436-s011.pdf]
